# Supplementary material for: Design of atomically precise Au2Pd6nanoclusters for boosting electrocatalytic hydrogen evolution on MoS2
Source: Royal Society of Chemistry journal article supplement (doi:10.1039/c8qi00697k), 2018-01-01
Supplement: c8qi00697k1.pdf [file c8qi00697k1.pdf]

## Supporting Information

### Design of Atomically Precise Au<sub>2</sub>Pd<sub>6</sub> Nanoclusters for Boosting Electrocatalytic Hydrogen Evolution on MoS<sub>2</sub>

Yuanxin Du,<sup>a,†</sup> Ji Xiang,<sup>a,†</sup> Kun Ni,<sup>b</sup> Yapei Yun,<sup>a</sup> Guodong Sun,<sup>a</sup> Xiaoyou Yuan,<sup>a</sup>  
Hongting Sheng,<sup>a</sup> Yanwu Zhu,<sup>b</sup> and Manzhou Zhu<sup>a\*</sup>

<sup>a</sup> Department of Chemistry and Center for Atomic Engineering of Advanced Materials, Anhui Province Key Laboratory of Chemistry for Inorganic/Organic Hybrid Functionalized Materials, Anhui University, Hefei, Anhui 230601, China. E-mail: [zmz@ahu.edu.cn](mailto:zmz@ahu.edu.cn)

<sup>b</sup> Key Laboratory of Materials for Energy Conversion, Chinese Academy of Sciences, Department of Materials Science and Engineering, Hefei National Laboratory for Physical Sciences at the Microscale, University of Science and Technology of China, 96 Jin Zhai Rd, Hefei, Anhui Province, 230026, China.

<sup>†</sup>Y. Du and J. Xiang contributed equally.

## Table of Contents:

|                                                                                                                                                                                                                                                                                                                        |     |
|------------------------------------------------------------------------------------------------------------------------------------------------------------------------------------------------------------------------------------------------------------------------------------------------------------------------|-----|
| <b>Fig. S1.</b> The absorption spectrum of Au <sub>2</sub> Pd <sub>6</sub> NC.                                                                                                                                                                                                                                         | 3   |
| <b>Fig. S2-S5.</b> The geometric structure ananalysis of Au <sub>2</sub> Pd <sub>6</sub> NC.                                                                                                                                                                                                                           | 3-6 |
| <b>Fig. S6.</b> The TEM image and XRD pattern of MoS <sub>2</sub> .                                                                                                                                                                                                                                                    | 7   |
| <b>Fig. S7.</b> The XRD pattern of Au <sub>2</sub> Pd <sub>6</sub> /MoS <sub>2</sub> .                                                                                                                                                                                                                                 | 7   |
| <b>Fig. S8-S9.</b> The absorption spectrum, mass spectrum, and geometric structure of Pd <sub>3</sub> and Au <sub>2</sub> NC.                                                                                                                                                                                          | 7-8 |
| <b>Fig. S10.</b> Exchange current density calculation of samples (Au <sub>2</sub> Pd <sub>6</sub> /MoS <sub>2</sub> , Au <sub>2</sub> -Pd <sub>3</sub> /MoS <sub>2</sub> , Pd <sub>3</sub> /MoS <sub>2</sub> , Au <sub>2</sub> /MoS <sub>2</sub> and MoS <sub>2</sub> ).                                               | 8   |
| <b>Fig. S11.</b> Cyclic voltammograms (0.3-0.4 V) recorded in 0.5 M H <sub>2</sub> SO <sub>4</sub> for samples (Au <sub>2</sub> Pd <sub>6</sub> /MoS <sub>2</sub> , Au <sub>2</sub> -Pd <sub>3</sub> /MoS <sub>2</sub> , Pd <sub>3</sub> /MoS <sub>2</sub> , Au <sub>2</sub> /MoS <sub>2</sub> and MoS <sub>2</sub> ). | 9   |
| <b>Fig. S12.</b> Cyclic voltammograms (−0.1–0.6 V) in pH = 7 phosphate buffer for various samples (Au <sub>2</sub> Pd <sub>6</sub> /MoS <sub>2</sub> , Au <sub>2</sub> -Pd <sub>3</sub> /MoS <sub>2</sub> , Pd <sub>3</sub> /MoS <sub>2</sub> , Au <sub>2</sub> /MoS <sub>2</sub> and MoS <sub>2</sub> ).              | 10  |
| <b>Fig. S13.</b> Calculated TOF of various samples (Au <sub>2</sub> Pd <sub>6</sub> /MoS <sub>2</sub> , Au <sub>2</sub> -Pd <sub>3</sub> /MoS <sub>2</sub> , Pd <sub>3</sub> /MoS <sub>2</sub> , Au <sub>2</sub> /MoS <sub>2</sub> and MoS <sub>2</sub> ).                                                             | 10  |
| <b>Fig. S14.</b> The TEM image, XRD pattern and XPS spectra of Au <sub>2</sub> Pd <sub>6</sub> /MoS <sub>2</sub> after long-time HER tests.                                                                                                                                                                            | 11  |
| <b>Fig. S15.</b> Pd 3d XPS spectra of Pd <sub>3</sub> and Pd <sub>3</sub> /MoS <sub>2</sub> .                                                                                                                                                                                                                          | 12  |
| <b>Fig. S16.</b> Raman spectra of MoS <sub>2</sub> , Pd <sub>3</sub> /MoS <sub>2</sub> and Au <sub>2</sub> Pd <sub>6</sub> /MoS <sub>2</sub> .                                                                                                                                                                         | 12  |
| <b>Fig. S17.</b> Different H adsorption sites in Au <sub>2</sub> Pd <sub>6</sub> NC and Au <sub>2</sub> Pd <sub>6</sub> /MoS <sub>2</sub> system.                                                                                                                                                                      | 13  |
| <b>Fig. S18.</b> The optimal H adsorption site in defect-free MoS <sub>2</sub> .                                                                                                                                                                                                                                       | 13  |
| <b>Fig. S19.</b> The other two sites (site 5, site 6) with the appropriate $\Delta G_H^*$ in Au <sub>2</sub> Pd <sub>6</sub> /MoS <sub>2</sub> system.                                                                                                                                                                 | 14  |
| <b>Fig. S20.</b> The optimal H adsorption site (site 4) in Au <sub>2</sub> Pd <sub>6</sub> NC.                                                                                                                                                                                                                         | 14  |
| <b>Fig. S21.</b> Different H adsorption sites in Pd <sub>3</sub> NC and Pd <sub>3</sub> /MoS <sub>2</sub> system.                                                                                                                                                                                                      | 15  |
| <b>Fig. S22.</b> Different H adsorption sites in Au <sub>2</sub> NC and Au <sub>2</sub> /MoS <sub>2</sub> system.                                                                                                                                                                                                      | 15  |
| <b>Fig. S23-S24.</b> The density of state of different atoms in Au <sub>2</sub> Pd <sub>6</sub> /MoS <sub>2</sub> and the charge deformation density of Au <sub>2</sub> Pd <sub>6</sub> /MoS <sub>2</sub> .                                                                                                            | 16  |

**Table S1-S2.** The electrochemical parameters of samples in this work and the comparison to other MoS<sub>2</sub>-metal based HER catalysts.-----17

**Table S3-S8.** The Gibbs free energy of hydrogen adsorption on different sites in Au<sub>2</sub>Pd<sub>6</sub> NC, Au<sub>2</sub>Pd<sub>6</sub>/MoS<sub>2</sub>, Pd<sub>3</sub> NC, Pd<sub>3</sub>/MoS<sub>2</sub>, Au<sub>2</sub> NC, Au<sub>2</sub>/MoS<sub>2</sub> system.-----18-20

**Reference**-----21

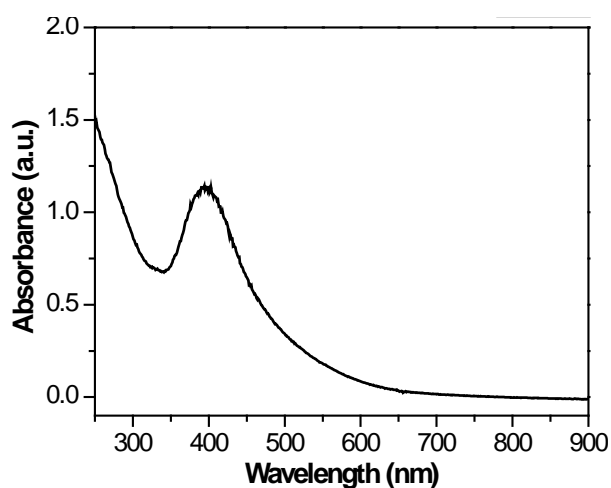

**Fig. S1.** Optical absorption spectrum of Au<sub>2</sub>Pd<sub>6</sub> NC.

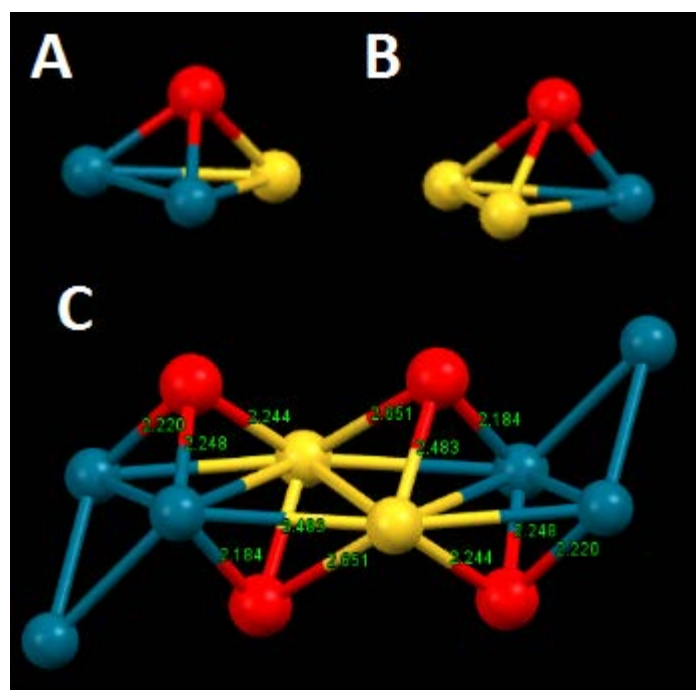

**Fig. S2.** (A) The one way of one S atom linked to two Pd atoms and one Au atom, (B) the another way of one S atom linked to two Au atoms and one Pd atom, (C) The distance of Au-S, and Pd-S in the Au<sub>2</sub>Pd<sub>6</sub> NC. (Color labels: yellow = Au, blue = Pd,

red = S)

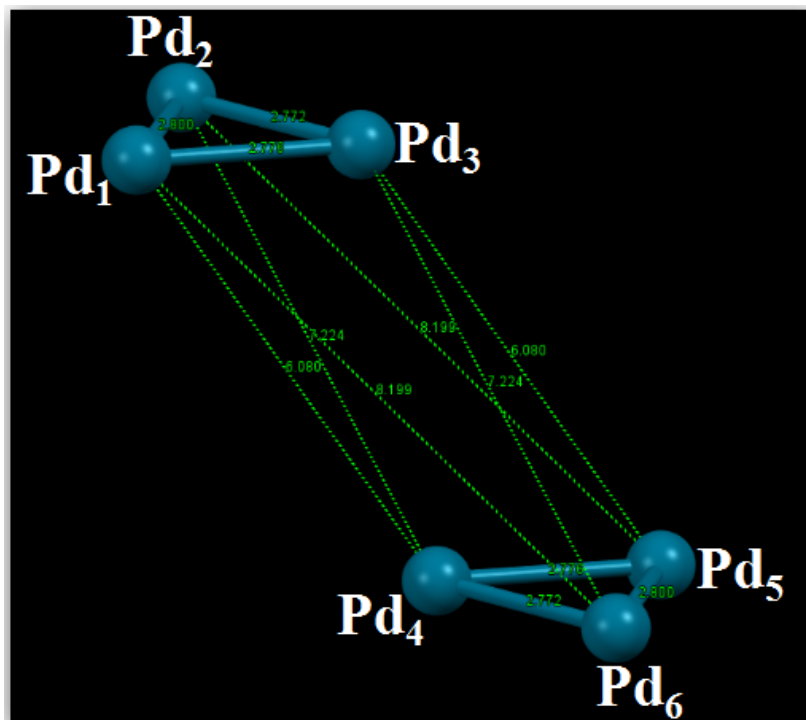

**Fig. S3.** The distances between Pd atoms in the two triangular Pd<sub>3</sub> units of Au<sub>2</sub>Pd<sub>6</sub> NC. From Fig. S3, the Pd-Pd distances in the Pd<sub>3</sub> units were 2.772 Å, 2.776 Å, 2.800 Å. The distances between Pd<sub>3</sub>-Pd<sub>6</sub> and Pd<sub>2</sub>-Pd<sub>4</sub> were 7.224 Å, the distances between Pd<sub>1</sub>-Pd<sub>4</sub> and Pd<sub>3</sub>-Pd<sub>5</sub> were 6.080 Å, and the distances between Pd<sub>2</sub>-Pd<sub>5</sub> and Pd<sub>1</sub>-Pd<sub>6</sub> were 8.199 Å. The quadrangles of Pd<sub>2</sub>Pd<sub>3</sub>Pd<sub>6</sub>Pd<sub>4</sub>, Pd<sub>1</sub>Pd<sub>3</sub>Pd<sub>5</sub>Pd<sub>4</sub>, and Pd<sub>2</sub>Pd<sub>1</sub>Pd<sub>6</sub>Pd<sub>5</sub> were parallelogram, which means that the two triangular Pd<sub>3</sub> units were paralleled.

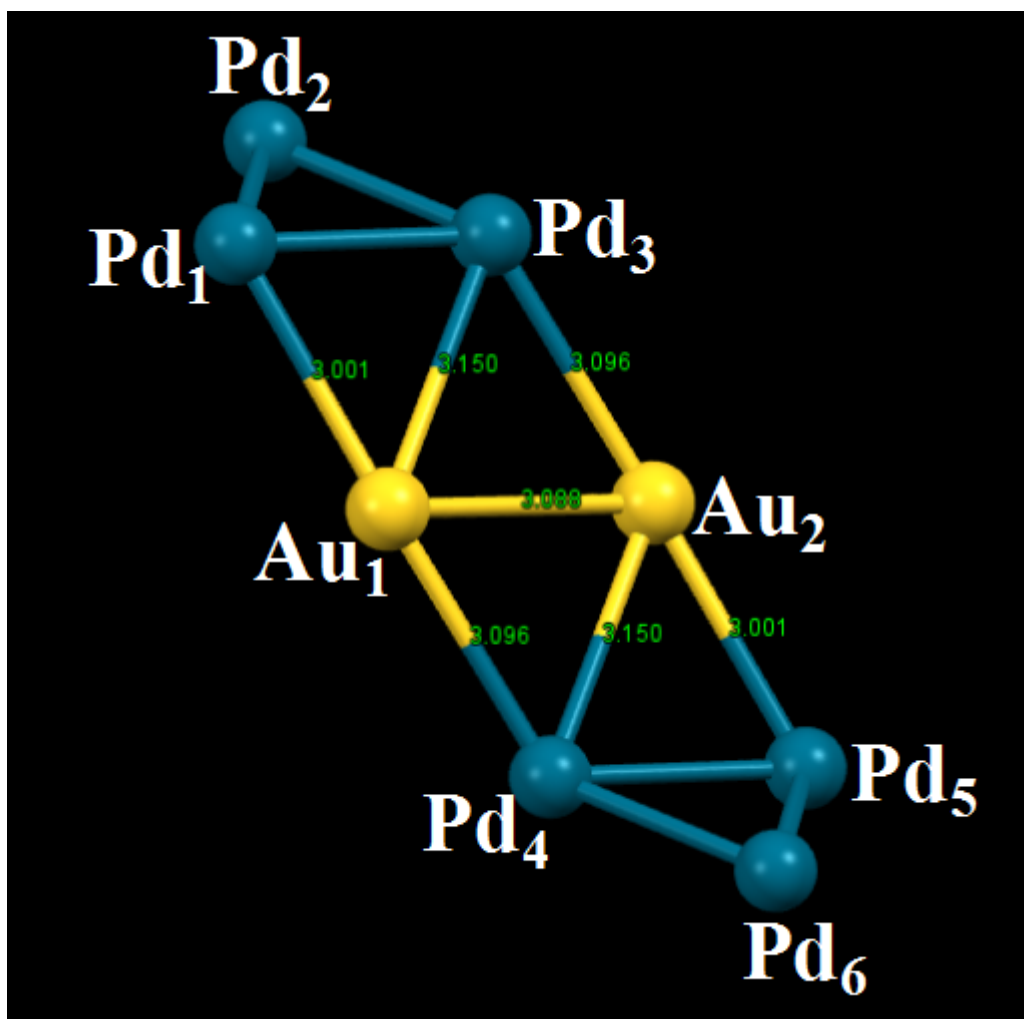

**Fig. S4.** The distances between the Au and Pd atoms in the  $\text{Au}_2\text{Pd}_6$  metal core of  $\text{Au}_2\text{Pd}_6$  NC. In the  $\text{Au}_2\text{Pd}_6$  core, the distance between  $\text{Au}_1$ - $\text{Au}_2$  was 3.088 Å, which is greatly larger than the bulk Au-Au distance (2.88 Å). The Au-Pd distances in the  $\text{Au}_2\text{Pd}_6$  core were 3.001 Å, 3.096 Å, 3.150 Å, respectively.

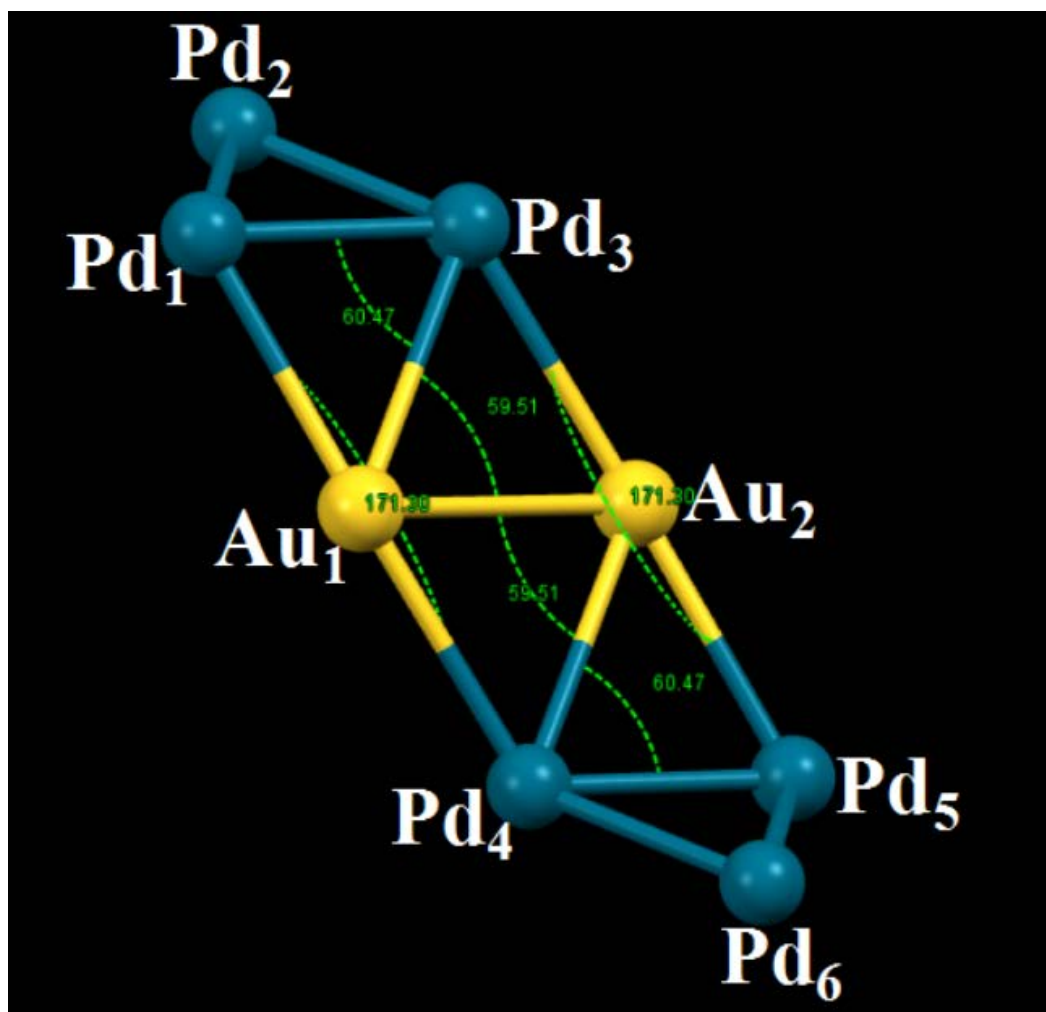

**Fig. S5.** The angles of Au and Pd atoms in the  $\text{Au}_2\text{Pd}_6$  metal core of  $\text{Au}_2\text{Pd}_6$  NC. The angles of  $\text{Pd}_1\text{-Au}_1\text{-Pd}_4$  and  $\text{Pd}_3\text{-Au}_2\text{-Pd}_5$  were  $171.30^\circ$ , the angles of  $\text{Pd}_1\text{-Pd}_3\text{-Au}_1$  and  $\text{Au}_2\text{-Pd}_4\text{-Pd}_5$  were  $60.47^\circ$ , and the angles of  $\text{Pd}_3\text{-Au}_1\text{-Au}_2$  and  $\text{Au}_1\text{-Au}_2\text{-Pd}_4$  were  $59.51^\circ$ , which means that the quadrangle of  $\text{Pd}_1\text{Pd}_3\text{Au}_1\text{Au}_2\text{Pd}_4\text{Pd}_5$  was twisty.

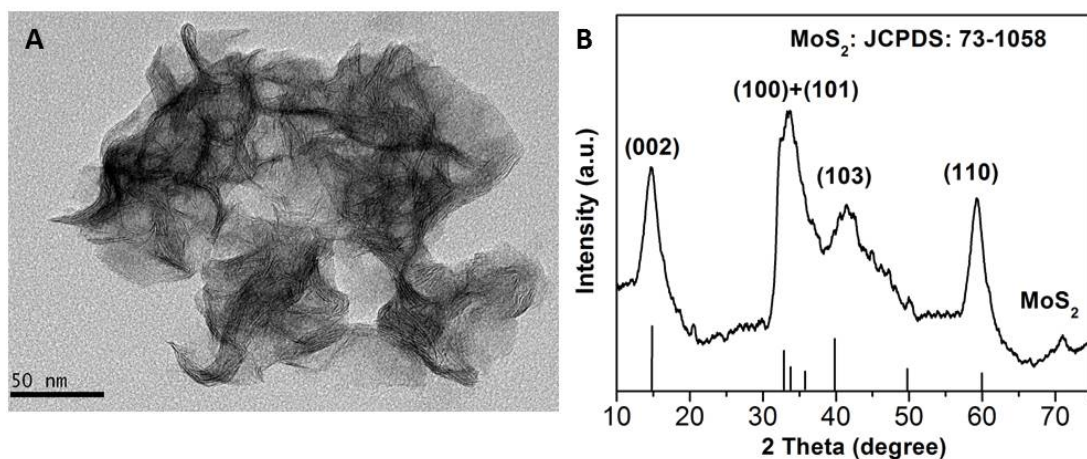

**Fig. S6.** (A) TEM image and (B) XRD pattern of MoS<sub>2</sub>.

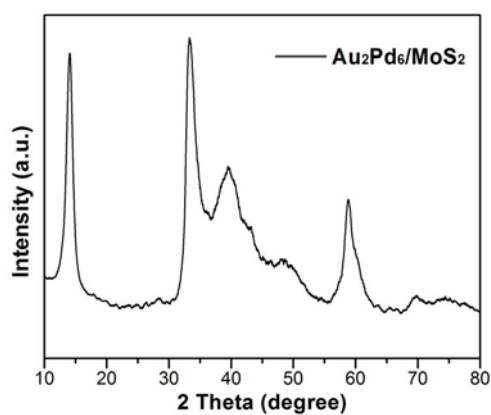

**Fig. S7.** XRD pattern of Au<sub>2</sub>Pd<sub>6</sub>/MoS<sub>2</sub>.

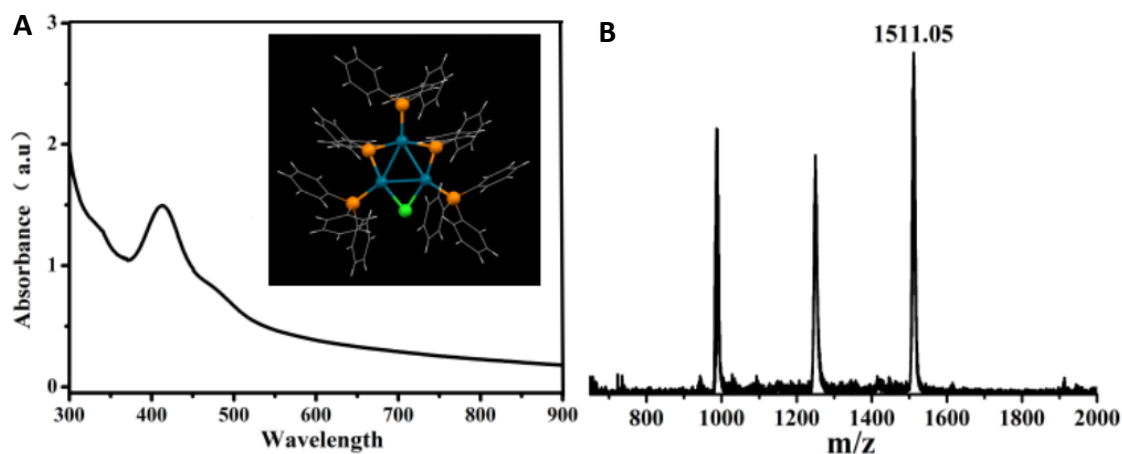

**Fig. S8.** (A) UV-vis and (B) MALDI-MS spectra of Pd<sub>3</sub> NC. Inset of (A): crystal structure of Pd<sub>3</sub> NC (blue = Pd, deep yellow = P, red = Cl). Fig. S8A shows the UV-vis spectrum of Pd<sub>3</sub> NC, in which the peaks at 340, 418, and 485 nm are fingerprints of Pd<sub>3</sub> NC. The X-ray structure of Pd<sub>3</sub> NC (Fig. S8A, inset) comprises a

triangular  $\text{Pd}_3$  unit protected by three  $-\text{PPh}_3$ , three  $-\text{PPh}_2$ , and one  $\text{Cl}$  atom. Fig. S8B shows the matrix-assisted laser desorption ionization mass spectrometry (MALDI-MS) of  $\text{Pd}_3 \text{ NC}$  with the molecular ion peak at  $\sim 1511.8$  Da (theoretical  $M_w = 1511.05$ ).

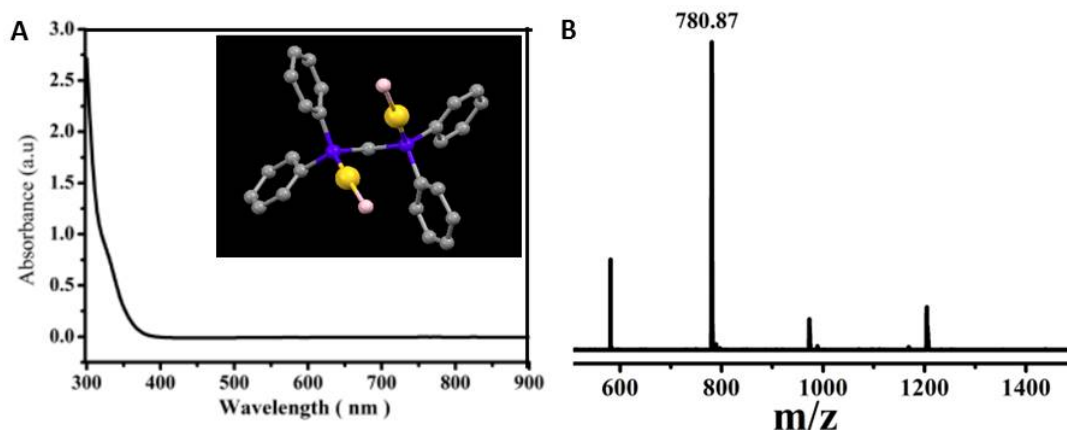

**Fig. S9.** (A) UV-vis and (B) MALDI-MS spectra of  $\text{Au}_2$  complex. Inset of (A): simulated diagram of  $\text{Au}_2$  complex crystal structure (yellow = Au, purple = P, pink = Cl). The UV-vis spectrum of  $\text{Au}_2$  showed one peak at 330 nm (Fig. S9A). Fig. S9B showed the matrix-assisted laser desorption ionization mass spectrometry (MALDI-MS) of  $\text{Au}_2$  with the molecular ion peak at  $\sim 780.87$  (theretical  $[\text{M}-2\text{Cl}+2\text{H}]_w = 780.155$ ).

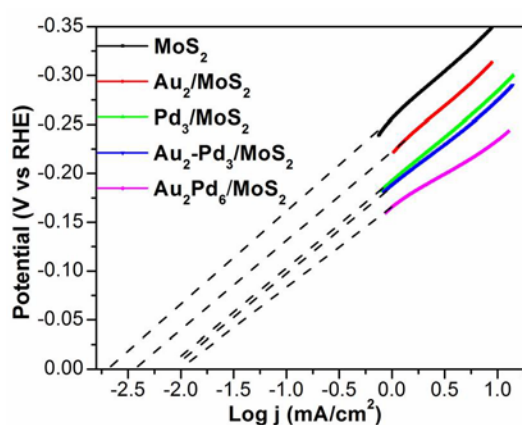

**Fig. S10.** Exchange current density of various samples calculated using extrapolation methods.



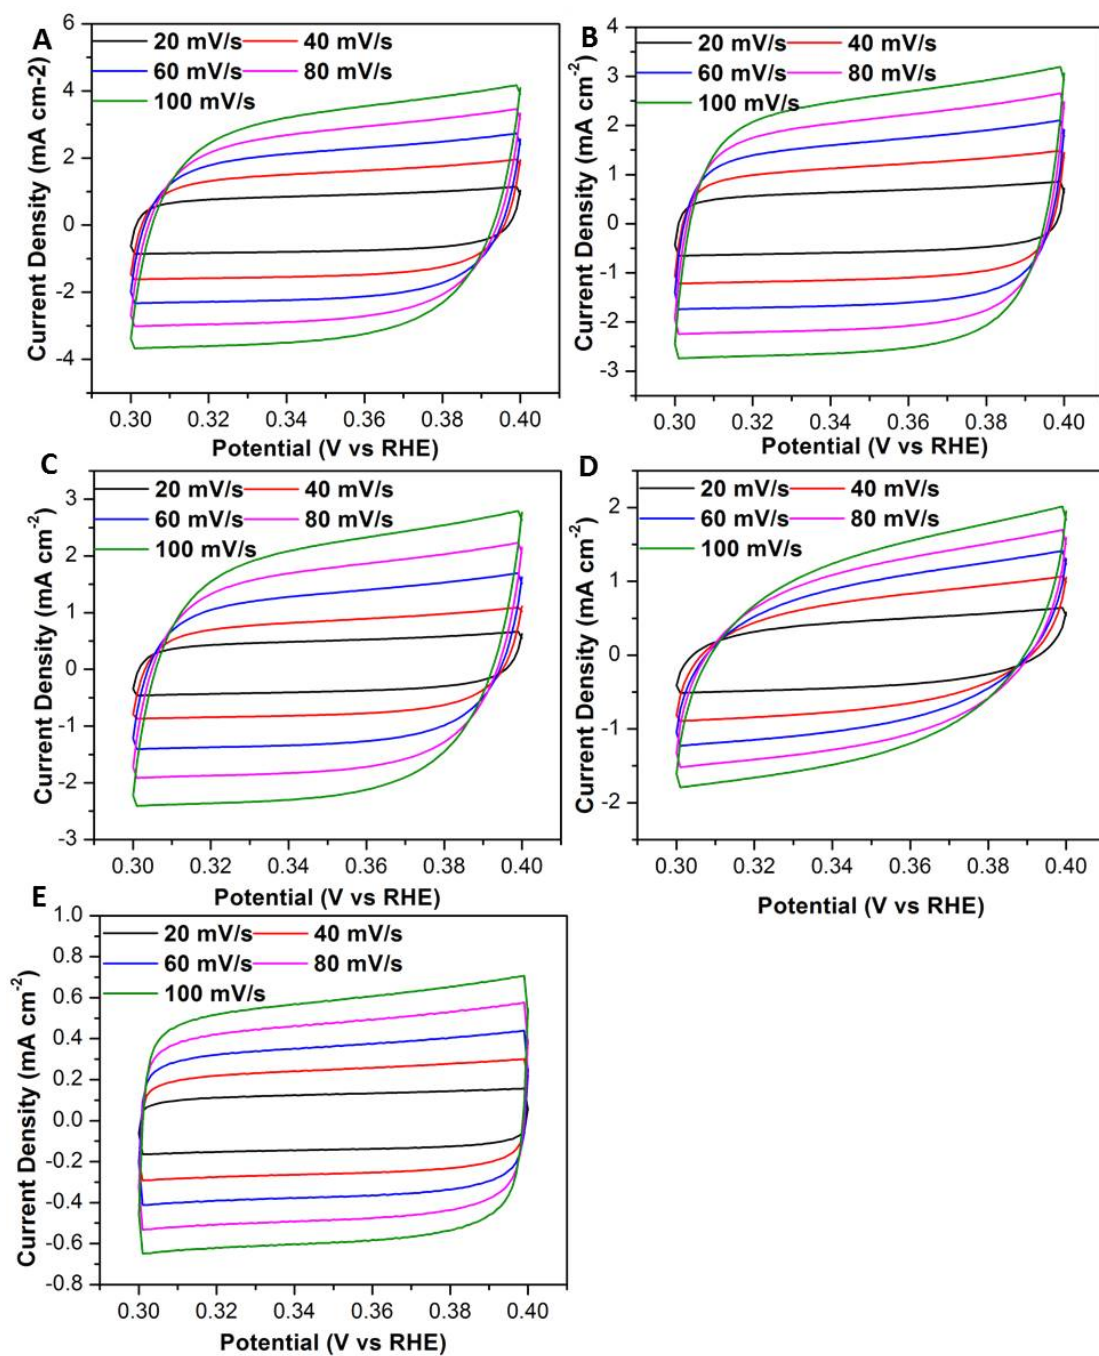

**Fig. S11.** Cyclic voltammograms (0.3-0.4 V) recorded in 0.5 M  $\text{H}_2\text{SO}_4$  for (A)  $\text{Au}_2\text{Pd}_6/\text{MoS}_2$ , (B)  $\text{Au}_2\text{-Pd}_3/\text{MoS}_2$ , (C)  $\text{Pd}_3/\text{MoS}_2$ , (D)  $\text{Au}_2/\text{MoS}_2$  and (E)  $\text{MoS}_2$ .

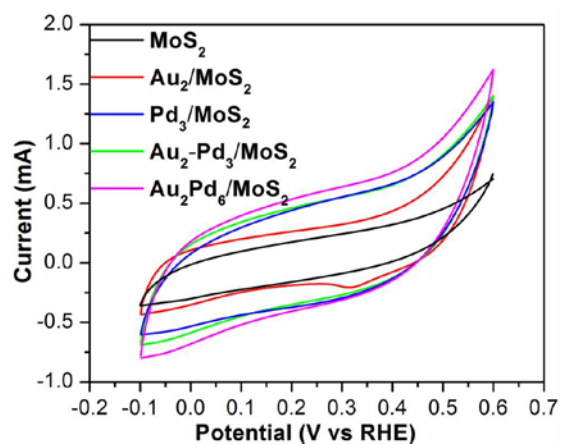

**Fig. S12.** Cyclic voltammograms (−0.1–0.6 V) recorded in pH = 7 phosphate buffer, scan rate: 50 mV/S.

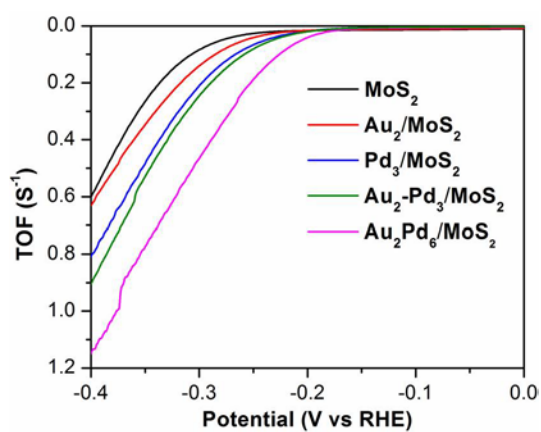

**Fig. S13.** Calculated turnover frequencies for MoS<sub>2</sub> and various NCs modified MoS<sub>2</sub>.

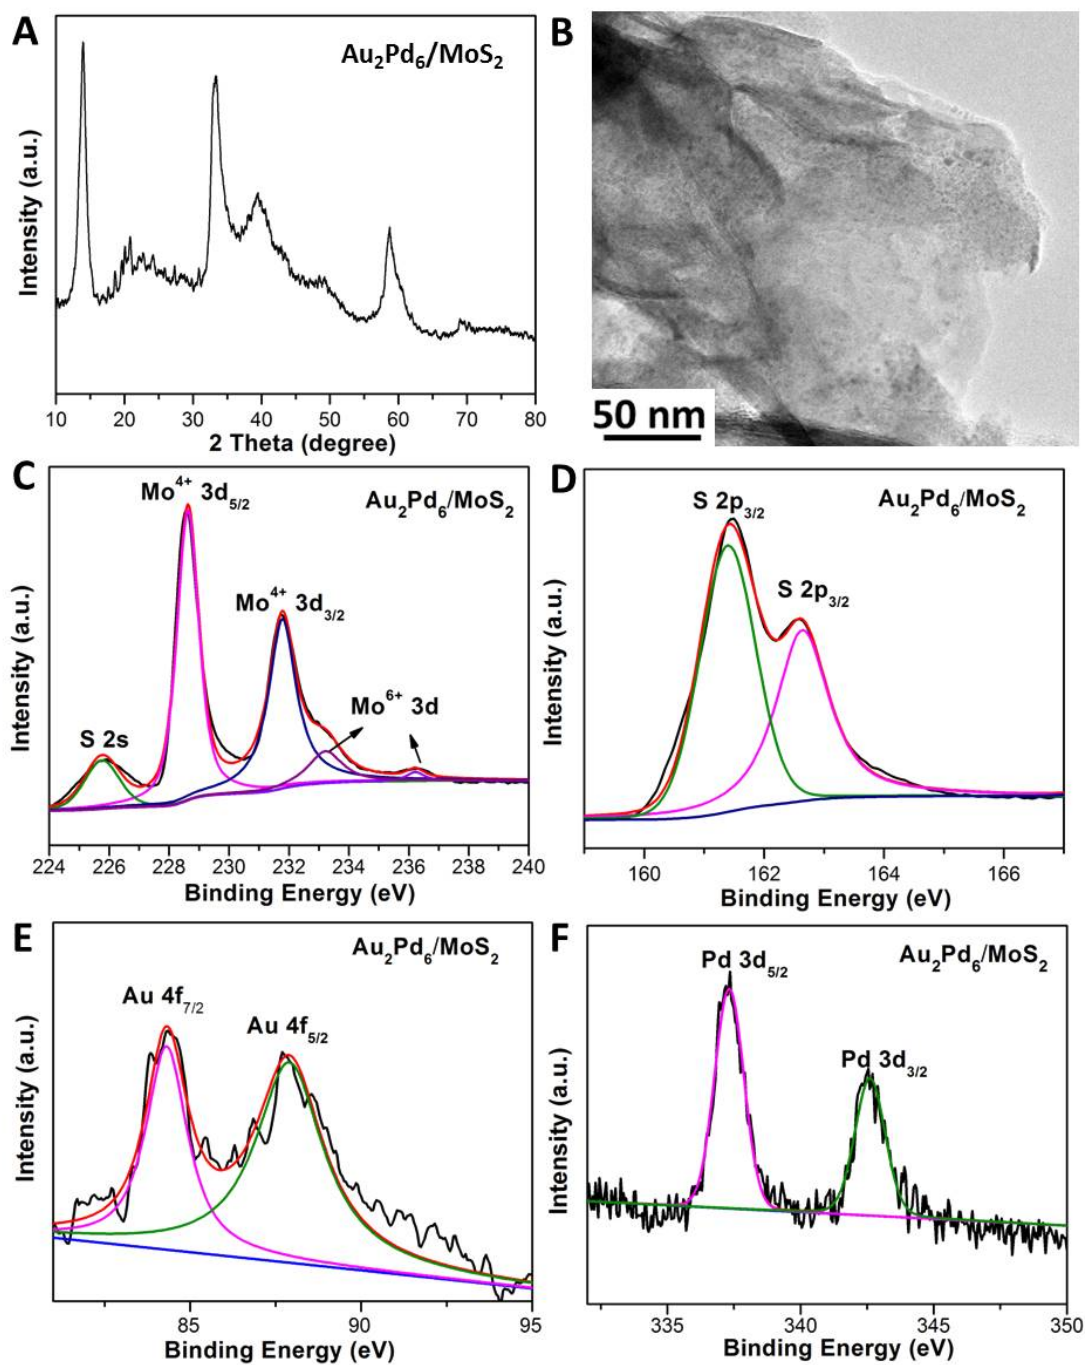

**Fig. S14.** (A) XRD pattern, (B) TEM image, (C) Mo 3d, (D) S 2p, (E) Au 4f, and (F) Pd 3d XPS spectra of  $\text{Au}_2\text{Pd}_6/\text{MoS}_2$  after long-time durability test.

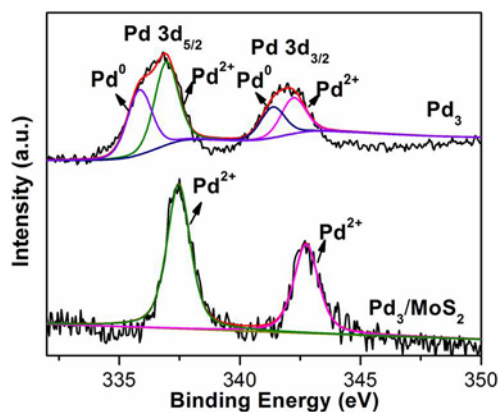

**Fig. S15.** Pd 3d XPS spectra of Pd<sub>3</sub> and Pd<sub>3</sub>/MoS<sub>2</sub>.

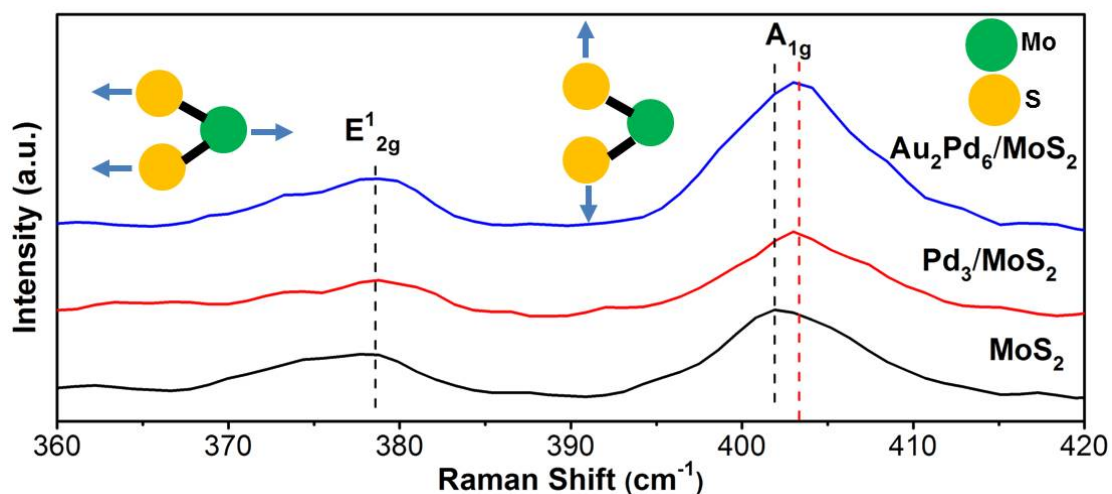

**Fig. S16.** Raman spectra of MoS<sub>2</sub>, Pd<sub>3</sub>/MoS<sub>2</sub> and Au<sub>2</sub>Pd<sub>6</sub>/MoS<sub>2</sub>, the inset shows the schematic illustrations of the oscillating modes of E'<sub>2g</sub> and A<sub>1g</sub>, respectively. Atom color code: green, Mo; yellow, S.

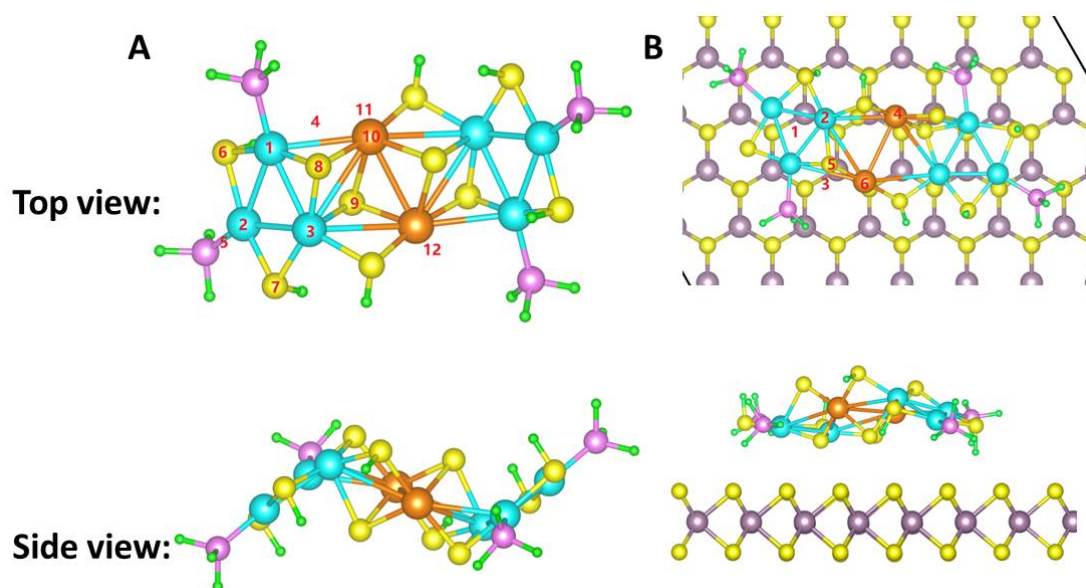

**Fig. S17.** Different H adsorption sites in (A)  $\text{Au}_2\text{Pd}_6$  NC system and (B)  $\text{Au}_2\text{Pd}_6/\text{MoS}_2$  system. Yellow ball: S, purple ball: Mo, blue ball: Pd, orange ball: Au, pink ball: P, green ball: H.

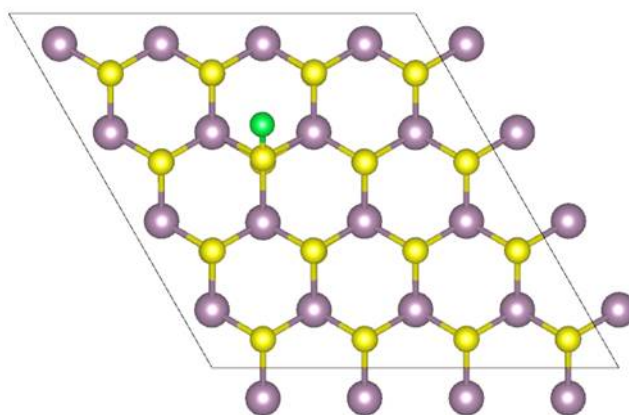

**Fig. S18.** The optimal H adsorption position in defect-free  $\text{MoS}_2$ , the corresponding  $\Delta G_{\text{H}}^*$  is 1.83 eV. Yellow ball: S, purple ball: Mo, green ball: the adsorption H.



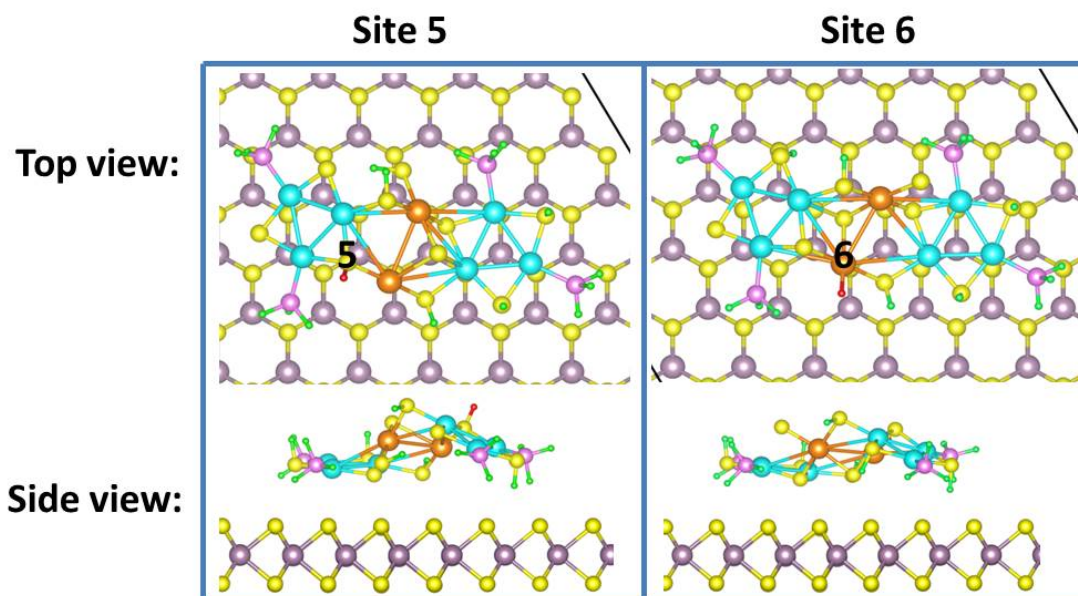

**Fig. S19.** The specific position of the other two sites with the appropriate  $\Delta G_H^*$  in Au<sub>2</sub>Pd<sub>6</sub>/MoS<sub>2</sub> system. Yellow ball: S, purple ball: Mo, blue ball: Pd, orange ball: Au, pink ball: P, green ball: H, red ball: the adsorption H.

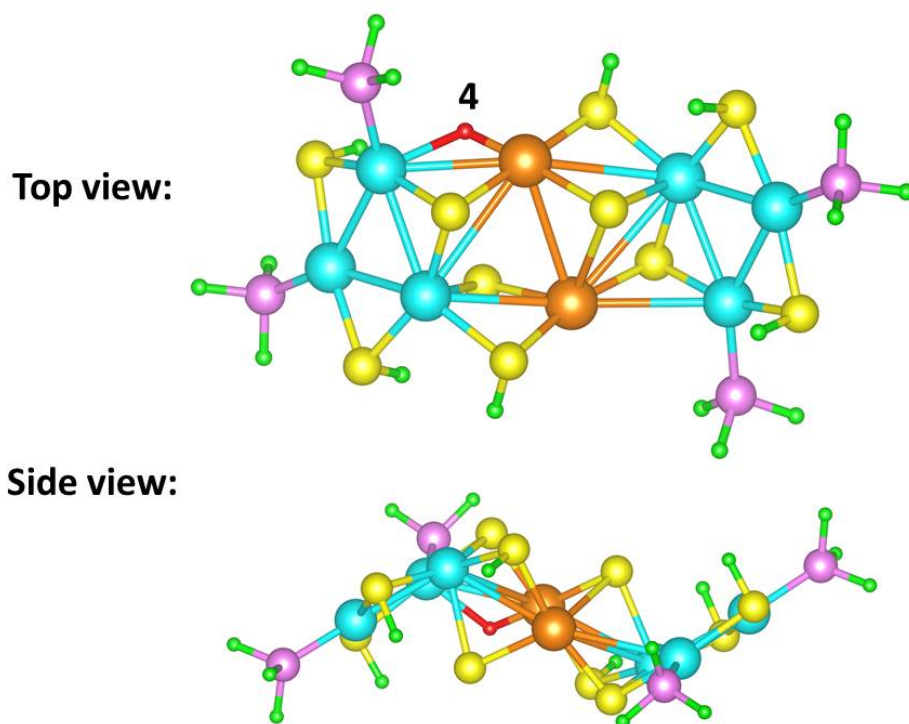

**Fig. S20.** H adsorption configuration (site 4) in the Au<sub>2</sub>Pd<sub>6</sub> NC (from different orientations) with best  $\Delta G_H^*$  value. Yellow ball: S, blue ball: Pd, orange ball: Au, pink ball: P, green ball: H, red ball: the adsorption H.

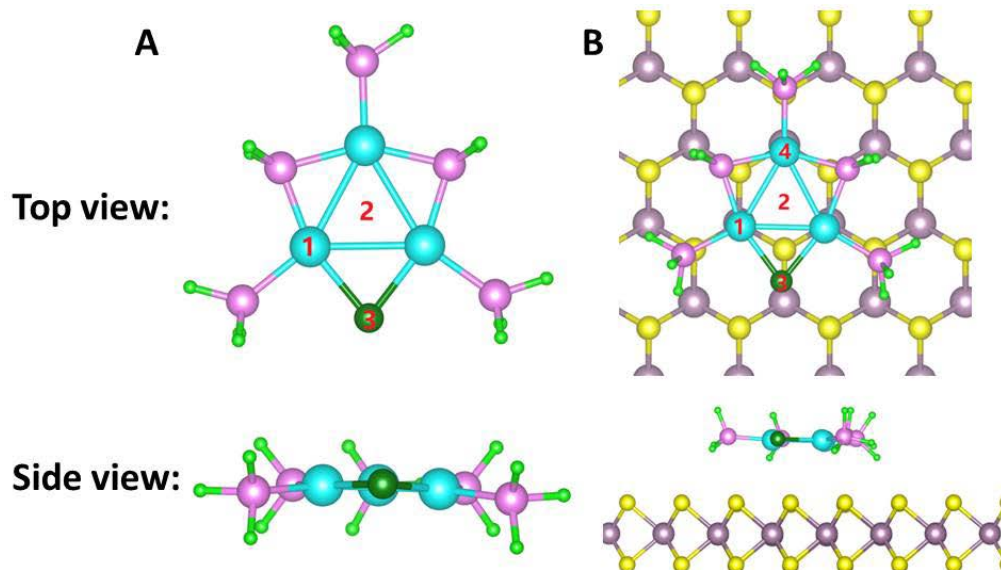

**Fig. S21.** Different H adsorption sites in (A) Pd<sub>3</sub> NC system and (B) Pd<sub>3</sub>/MoS<sub>2</sub> system. Yellow ball: S, purple ball: Mo, blue ball: Pd, pink ball: P, dark green ball: Cl, green ball: H.

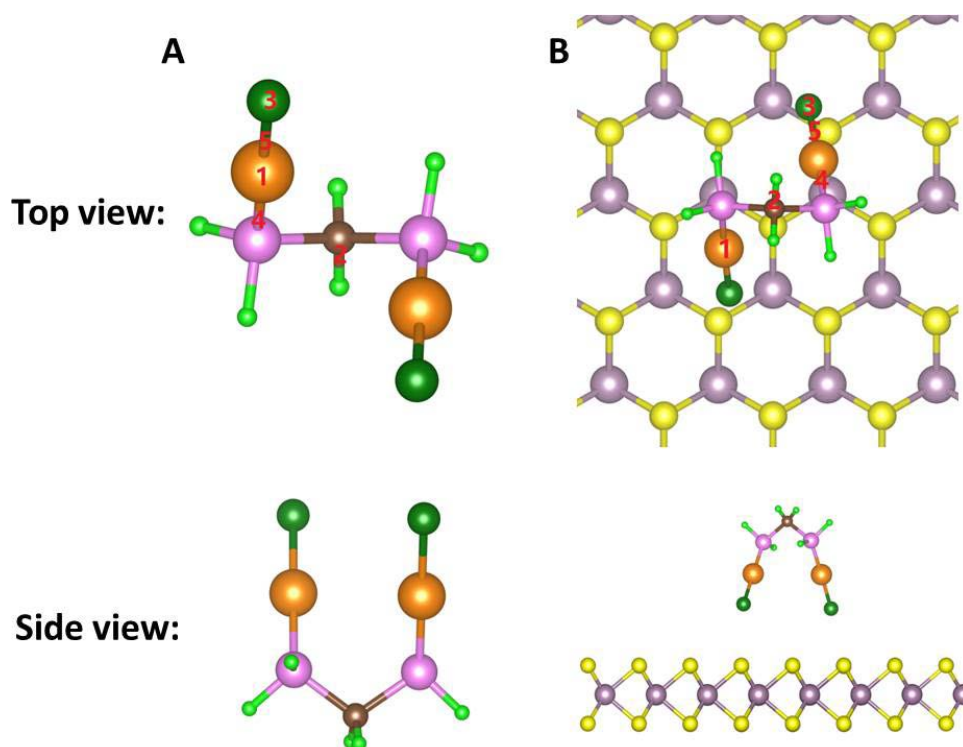

**Fig. S22.** Different H adsorption sites in (A) Au<sub>2</sub> NC system and (B) Au<sub>2</sub>/MoS<sub>2</sub> system. Yellow ball: S, purple ball: Mo, orange ball: Au, pink ball: P, dark green ball: Cl, brown ball: C, green ball: H.

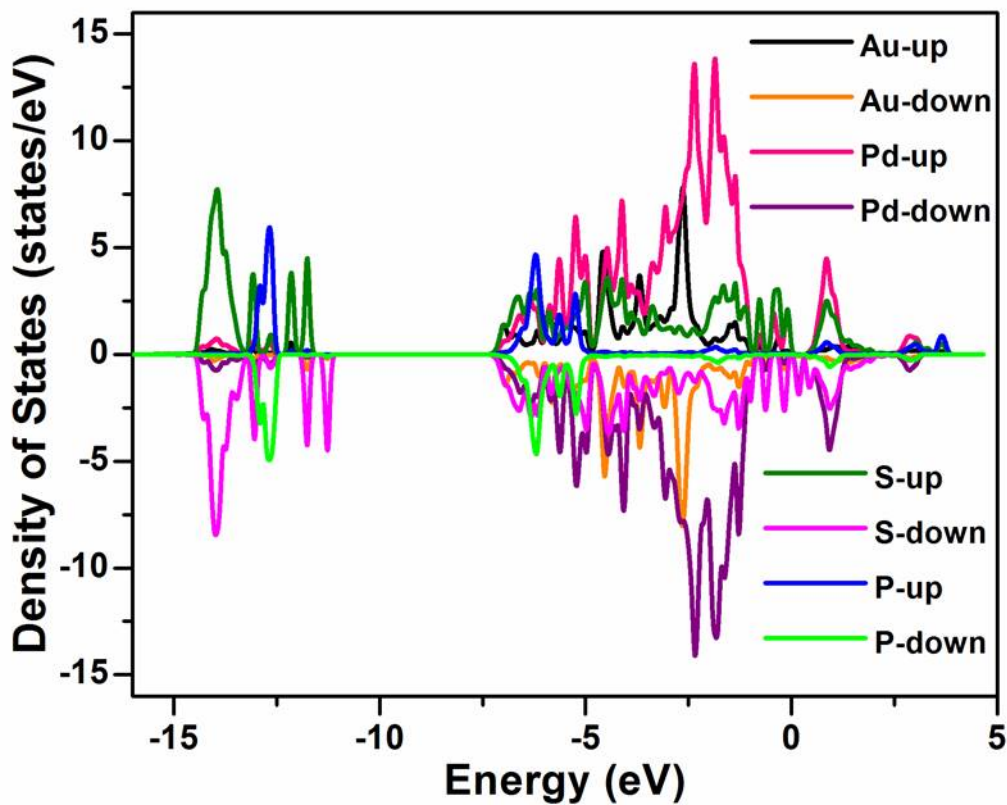

**Fig. S23.** The density of states of Au, Pd, S and P atoms in the  $\text{Au}_2\text{Pd}_6/\text{MoS}_2$  system.

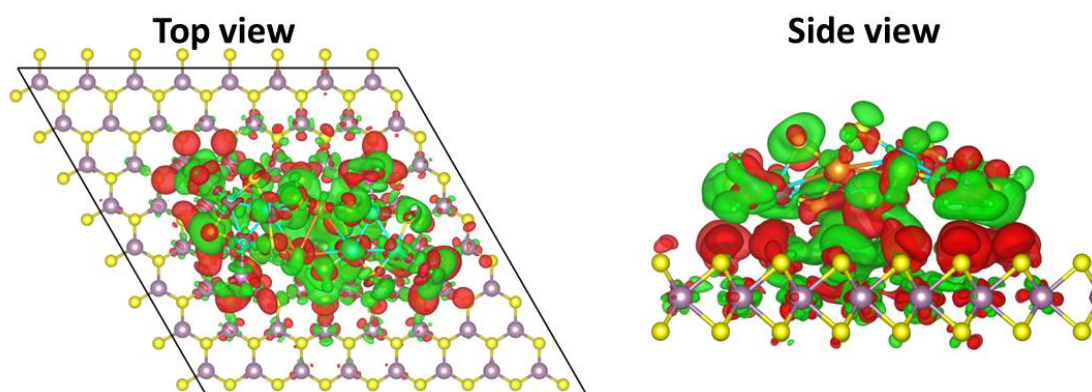

**Fig. S24.** The charge deformation density of  $\text{Au}_2\text{Pd}_6/\text{MoS}_2$  system. The charge density of  $\text{Au}_2\text{Pd}_6$  NC is decreased, while the charge density of  $\text{MoS}_2$  is increased, it indicates the charge transfer from NC to  $\text{MoS}_2$ .



**Table S1.** Electrochemical Parameters of bare MoS<sub>2</sub> and various NCs modified MoS<sub>2</sub>.

| Catalyst                                           | Onset overpotential (mV) | Overpotential at 10 mA/cm <sup>2</sup> (mV) | Current density at 400 mV (mA/cm <sup>2</sup> ) | Tafel slope (mV/dec) | Exchange current density (μA/cm <sup>2</sup> ) | Double layer capacitance (mF/cm <sup>2</sup> ) | Charge transfer resistance (Ω) | Series resistance (Ω) | The number of Active sites (×10 <sup>-3</sup> mol/g) | TOF at 400 mV (s <sup>-1</sup> ) |
|----------------------------------------------------|--------------------------|---------------------------------------------|-------------------------------------------------|----------------------|------------------------------------------------|------------------------------------------------|--------------------------------|-----------------------|------------------------------------------------------|----------------------------------|
| MoS <sub>2</sub>                                   | 218                      | 355                                         | 20.5                                            | 97                   | 2.04                                           | 5.69                                           | 403                            | 14.13                 | 1.673                                                | 0.60                             |
| Au <sub>7</sub> /MoS <sub>2</sub>                  | 180                      | 319                                         | 30.1                                            | 94                   | 3.89                                           | 11.65                                          | 329                            | 10.42                 | 2.425                                                | 0.63                             |
| Pd <sub>3</sub> /MoS <sub>2</sub>                  | 148                      | 283                                         | 53.7                                            | 88                   | 7.58                                           | 22.48                                          | 181                            | 6.82                  | 3.373                                                | 0.80                             |
| Au <sub>2</sub> -Pd <sub>3</sub> /MoS <sub>2</sub> | 141                      | 273                                         | 61.7                                            | 86                   | 8.31                                           | 24.71                                          | 178                            | 6.45                  | 3.472                                                | 0.90                             |
| Au <sub>7</sub> Pd <sub>6</sub> /MoS <sub>2</sub>  | 127                      | 232                                         | 91                                              | 67                   | 9.88                                           | 32.08                                          | 163                            | 6.08                  | 4.02                                                 | 1.15                             |

**Table S2.** Comparison of HER performance of MoS<sub>2</sub>-based catalysts.

| Catalyst                                          | electrolyte                          | Onset overpotential (mV) | Overpotential at 10 mA/cm <sup>2</sup> (mV) | Current density at 400 mV (mA/cm <sup>2</sup> ) | Tafel slope (mV/dec) | Exchange current density (μA/cm <sup>2</sup> ) | Double layer capacitance (mF/cm <sup>2</sup> ) | Charge transfer resistance (Ω) | Reference |
|---------------------------------------------------|--------------------------------------|--------------------------|---------------------------------------------|-------------------------------------------------|----------------------|------------------------------------------------|------------------------------------------------|--------------------------------|-----------|
| MoS <sub>2</sub>                                  | 0.5 M H <sub>2</sub> SO <sub>4</sub> | 218                      | 355                                         | 20.5                                            | 97                   | 2.04                                           | 5.69                                           | 403                            | This work |
| Au <sub>2</sub> Pd <sub>6</sub> /MoS <sub>2</sub> | 0.5 M H <sub>2</sub> SO <sub>4</sub> | 127                      | 232                                         | 91                                              | 67                   | 9.88                                           | 32.08                                          | 163                            | This work |
| Au <sub>25</sub> /MoS <sub>2</sub>                | 0.5 M H <sub>2</sub> SO <sub>4</sub> | 200                      | 280                                         | 59.3                                            | 79.3                 | -                                              | -                                              | -                              | 1         |
| MoS <sub>2</sub> /Au 39.5 mol %                   | 0.5 M H <sub>2</sub> SO <sub>4</sub> | -                        | 350                                         | 22.62                                           | 56.97                | -                                              | -                                              | 162                            | 2         |
| MoS <sub>2</sub> -Au (dark)                       | 0.5 M H <sub>2</sub> SO <sub>4</sub> | 220                      | -                                           | 28 <sup>a</sup>                                 | 86                   | -                                              | -                                              | -                              | 3         |
| P. MoS <sub>2</sub> /Au                           | 0.5 M H <sub>2</sub> SO <sub>4</sub> | -                        | 279                                         | -                                               | 68.8                 | 0.921                                          | 1.6                                            | 13                             | 4         |
| Se-doped MoS <sub>2</sub>                         | 0.5 M H <sub>2</sub> SO <sub>4</sub> | 140                      | 275 <sup>a</sup>                            | 42.7                                            | 55                   | -                                              | -                                              | 650                            | 5         |
| Pt-MoS <sub>2</sub>                               | 0.1 M H <sub>2</sub> SO <sub>4</sub> | -                        | 150                                         | 27 <sup>a</sup>                                 | 96                   | -                                              | -                                              | -                              | 6         |
| Pt/MoS <sub>2</sub> -80                           | 0.5 M H <sub>2</sub> SO <sub>4</sub> | 31                       | 90 <sup>a</sup>                             | -                                               | 52                   | -                                              | 12.8                                           | 8                              | 7         |

Note: <sup>a</sup> The numerical value was calculated from the figure in the reference.

**Table S3.** The Gibbs free energy of hydrogen adsorption on different sites in Au<sub>2</sub>Pd<sub>6</sub> NC system.

| The Gibbs free energy of hydrogen adsorption ( $\Delta G_H^*$ ) on different sites in Au <sub>2</sub> Pd <sub>6</sub> system |                     |
|------------------------------------------------------------------------------------------------------------------------------|---------------------|
| Site in Figure S17A                                                                                                          | $\Delta G_H^*$ (eV) |
| 1                                                                                                                            | -1.32718            |
| 2                                                                                                                            | -1.3483             |
| 3                                                                                                                            | -1.14434            |
| 4                                                                                                                            | -0.03647            |
| 5                                                                                                                            | -2.22077            |
| 6                                                                                                                            | -0.59976            |
| 7                                                                                                                            | -2.56855            |
| 8                                                                                                                            | -0.87684            |
| 9                                                                                                                            | -3.06807            |
| 10                                                                                                                           | -2.21782            |
| 11                                                                                                                           | -1.41258            |
| 12                                                                                                                           | -1.4237             |

The calculated  $\Delta G_H^*$  on different sites in Au<sub>2</sub>Pd<sub>6</sub> NC system show that the best H adsorption site is site 4 in Fig. S17A and Fig. S20, the  $\Delta G_H^*$  on this site is -0.04 eV.

**Table S4.** The Gibbs free energy of hydrogen adsorption on different sites in Au<sub>2</sub>Pd<sub>6</sub>/MoS<sub>2</sub> system.

| The Gibbs free energy of hydrogen adsorption ( $\Delta G_H^*$ ) on different sites in Au <sub>2</sub> Pd <sub>6</sub> /MoS <sub>2</sub> system |                     |
|------------------------------------------------------------------------------------------------------------------------------------------------|---------------------|
| Site in Figure S17B                                                                                                                            | $\Delta G_H^*$ (eV) |
| 1                                                                                                                                              | 0.149833            |
| 2                                                                                                                                              | 0.4319              |
| 3                                                                                                                                              | 0.295432            |
| 4                                                                                                                                              | -0.01148            |
| 5                                                                                                                                              | 0.022313            |
| 6                                                                                                                                              | -0.02848            |

The calculated  $\Delta G_H^*$  on different sites in Au<sub>2</sub>Pd<sub>6</sub>/MoS<sub>2</sub> system show that the best H adsorption site is site 4 in Fig. S17B and Fig. 5A, the  $\Delta G_H^*$  on this site is -0.01 eV. Meanwhile, site 5 and site 6 also have an appropriate  $\Delta G_H^*$ , which is 0.02 and -0.03 eV, respectively. The site position is detailedly shown in Fig. S19.

**Table S5.** The Gibbs free energy of hydrogen adsorption on different sites in Pd<sub>3</sub> NC system.

| The Gibbs free energy of hydrogen adsorption ( $\Delta G_H^*$ ) on different sites in Pd <sub>3</sub> system |                     |
|--------------------------------------------------------------------------------------------------------------|---------------------|
| Site in Figure S21A                                                                                          | $\Delta G_H^*$ (eV) |
| 1                                                                                                            | 1.418051            |
| 2                                                                                                            | 0.72283             |
| 3                                                                                                            | 1.875788            |

**Table S6.** The Gibbs free energy of hydrogen adsorption on different sites in Pd<sub>3</sub>/MoS<sub>2</sub> NC system.

| The Gibbs free energy of hydrogen adsorption ( $\Delta G_H^*$ ) on different sites in Pd <sub>3</sub> /MoS <sub>2</sub> system |                     |
|--------------------------------------------------------------------------------------------------------------------------------|---------------------|
| Site in Figure S21B                                                                                                            | $\Delta G_H^*$ (eV) |
| 1                                                                                                                              | 1.00724             |
| 2                                                                                                                              | 0.961975            |
| 3                                                                                                                              | 0.391343            |
| 4                                                                                                                              | 0.993066            |

**Table S7.** The Gibbs free energy of hydrogen adsorption on different sites in Au<sub>2</sub> NC system.

| The Gibbs free energy of hydrogen adsorption ( $\Delta G_H^*$ ) on different sites in Au <sub>2</sub> system |                     |
|--------------------------------------------------------------------------------------------------------------|---------------------|
| Site in Figure S22A                                                                                          | $\Delta G_H^*$ (eV) |
| 1                                                                                                            | 1.733362            |
| 2                                                                                                            | 1.560567            |
| 3                                                                                                            | 2.279025            |
| 4                                                                                                            | 1.709955            |
| 5                                                                                                            | 1.705191            |

**Table S8.** The Gibbs free energy of hydrogen adsorption on different sites in Au<sub>2</sub>/MoS<sub>2</sub> system.

| The Gibbs free energy of hydrogen adsorption ( $\Delta G_H^*$ ) on different sites in Au <sub>2</sub> /MoS <sub>2</sub> system |                     |
|--------------------------------------------------------------------------------------------------------------------------------|---------------------|
| Site in Figure S22B                                                                                                            | $\Delta G_H^*$ (eV) |
| 1                                                                                                                              | 1.727127            |
| 2                                                                                                                              | 1.55778             |
| 3                                                                                                                              | 2.241595            |
| 4                                                                                                                              | 1.721984            |
| 5                                                                                                                              | 1.686808            |

## References

- [1] S. Zhao, R. Jin, Y. Song, H. Zhang, S. D. House, J. C. Yang, R. Jin, *small* **2017**, *13*, 10.1002/sml.201701519.
- [2] J. Kim, S. Byun, A. J. Smith, J. Yu, J. Huang, *J. Phys. Chem. Lett.* **2013**, *4*, 1227–1232.
- [3] Y. Shi, J. Wang, C. Wang, T.-T. Zhai, W.-J. Bao, J.-J. Xu, X.-H. Xia, H.-Y. Chen, *J. Am. Chem. Soc.* **2015**, *137*, 7365–7370.
- [4] S. T. Finn, J. E. Macdonald, *ACS Appl. Mater. Interfaces* **2016**, *8*, 25185–25192.
- [5] X. Ren, Q. Ma, H. Fan, L. Pang, Y. Zhang, Y. Yao, X. Ren, S. (Frank) Liu, *Chem. Commun.* **2015**, *51*, 15997–16000.
- [6] J. Deng, H. Li, J. Xiao, Y. Tu, D. Deng, H. Yang, H. Tian, J. Li, P. Ren, X. Bao, *Energy Environ. Sci.* **2015**, *8*, 1594–1601.
- [7] W. Ren, H. Zhang, C. Cheng, *Electrochimica Acta*, **2017**, *241*, 316–322.
